# Supplementary material for: Th2 single-cell heterogeneity and clonal distribution at distant sites in helminth-infected mice
Source: eLife journal article supplement (doi:10.7554/elife.74183), 2022-08-11
Supplement: supp [file elife-74183-supp-v1.zip]

Archive with 12 entries (12 files):
- elife_poa_e74183_Transparent_Reporting_File.docx
- elife_poa_e74183_Figure_1_figure_supplement_1.pdf
- elife_poa_e74183_Figure_1_figure_supplement_2.pdf
- elife_poa_e74183_Figure_1_figure_supplement_3.pdf
- elife_poa_e74183_Figure_2_figure_supplement_1.pdf
- elife_poa_e74183_Figure_2_figure_supplement_2.pdf
- elife_poa_e74183_Figure_2_figure_supplement_3.pdf
- elife_poa_e74183_Figure_3_figure_supplement_1.pdf
- elife_poa_e74183_Figure_5_figure_supplement_1.pdf
- elife_poa_e74183_Figure_5_figure_supplement_2.pdf
- elife_poa_e74183_Figure_6_figure_supplement_1.pdf
- elife_poa_e74183_Figure_5_source_data_1.txt
