# Supplementary material for: Th2 single-cell heterogeneity and clonal distribution at distant sites in helminth-infected mice
Source: eLife journal article supplement (doi:10.7554/elife.74183), 2022-08-11

Figure 6—figure supplement 1

A

| Type          | V            | D     | J       | C     | CDR3            |
|---------------|--------------|-------|---------|-------|-----------------|
| Nb-T1 α-chain | TRAV14N-4    |       | TRAJ22  | TRAC  | CAASGPSGSWQLIF  |
| Nb-T1 β-chain | TRBV5        | TRBD1 | TRBJ1-6 | TRBC1 | CASSQEGQYNSPLYF |
| Nb-T2 α-chain | TRAB13-4/DV7 |       | TRAJ53  | TRAC  | CAGGSNYKLTF     |
| Nb-T2 β-chain | TRBV13-3     |       | TRBJ1-4 | TRBC1 | CASSDATFSNERLFF |
| Nb-T3 α-chain | TRAV4-2      |       | TRAJ56  | TRAC  | CAVEGAGGNKLTF   |
| Nb-T3 β-chain | TRBV13-3     | TRBD2 | TRBJ2-3 | TRBC1 | CASSEGGRGAETLYF |

B

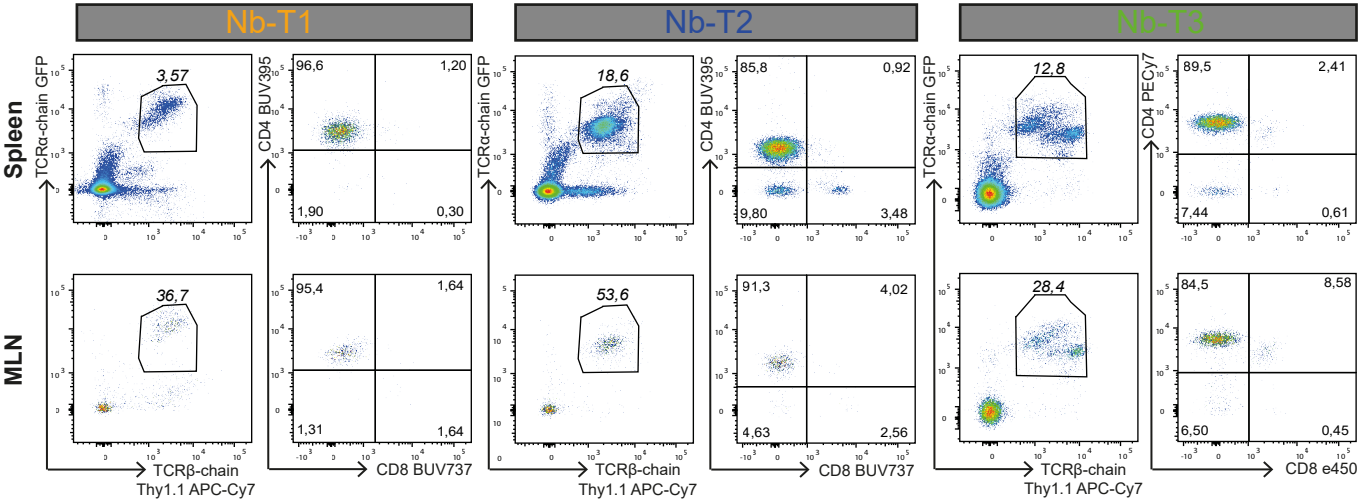

Supplement: supp [file elife-74183-supp-v1.zip › elife_poa_e74183_Figure_6_figure_supplement_1.pdf]
