# Supplementary figures and images for: Th2 single-cell heterogeneity and clonal distribution at distant sites in helminth-infected mice
Source: eLife journal article supplement (doi:10.7554/elife.74183), 2022-08-11

Figure 1—figure supplement 1

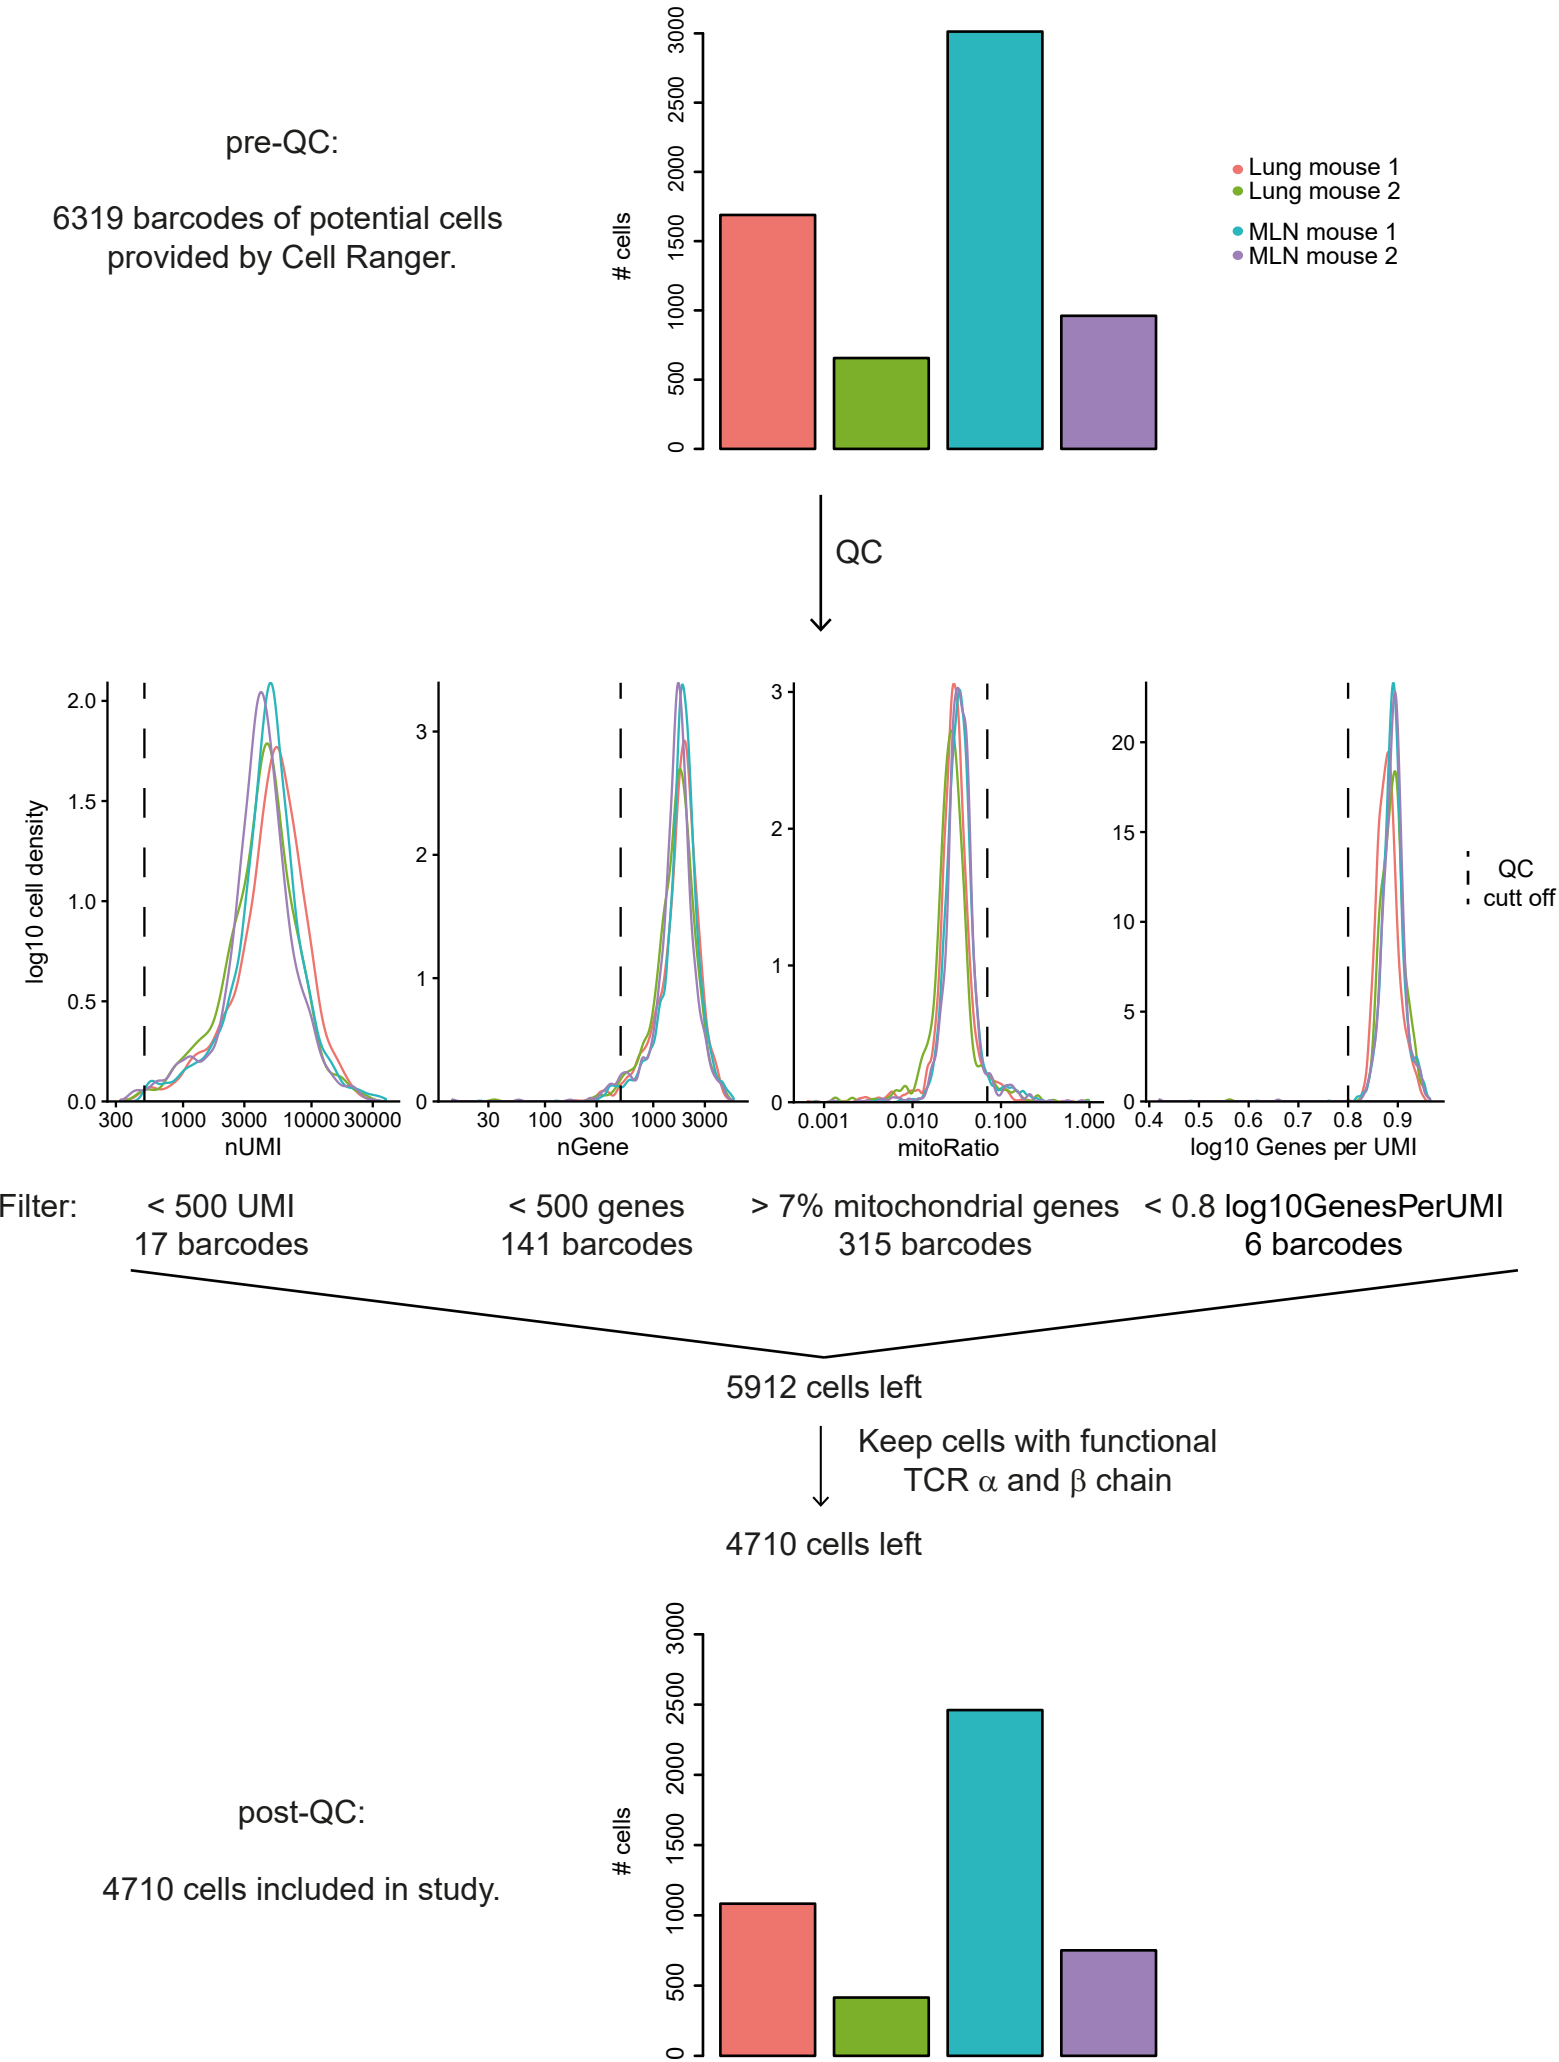

Supplement: supp [file elife-74183-supp-v1.zip › elife_poa_e74183_Figure_1_figure_supplement_1.pdf]

A

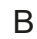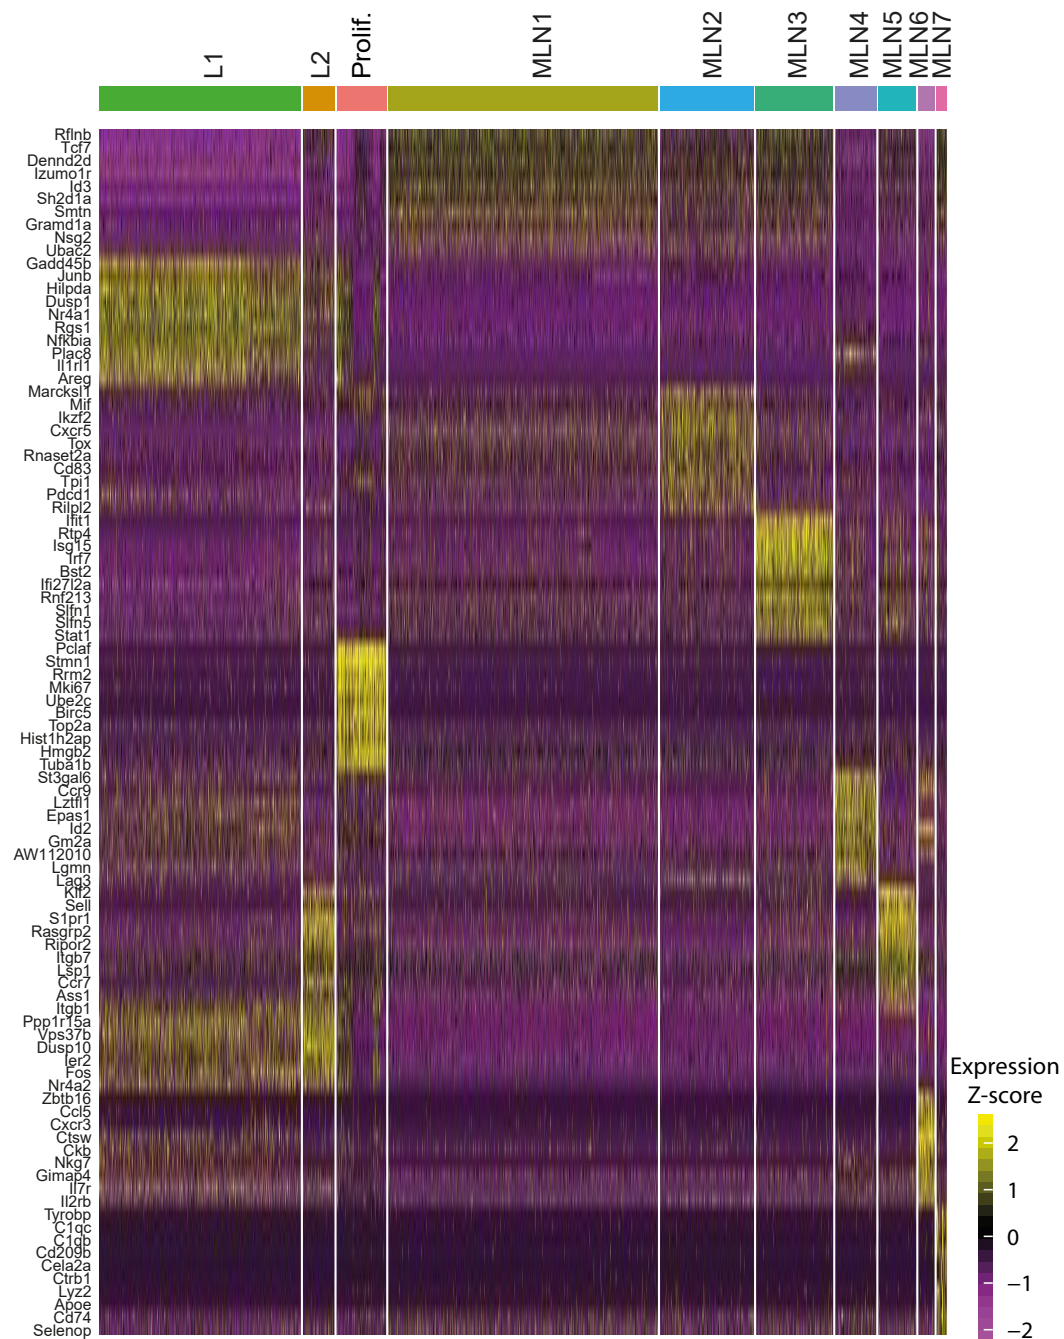

Supplement: supp [file elife-74183-supp-v1.zip › elife_poa_e74183_Figure_1_figure_supplement_2.pdf]

Figure 1—figure supplement 3

A

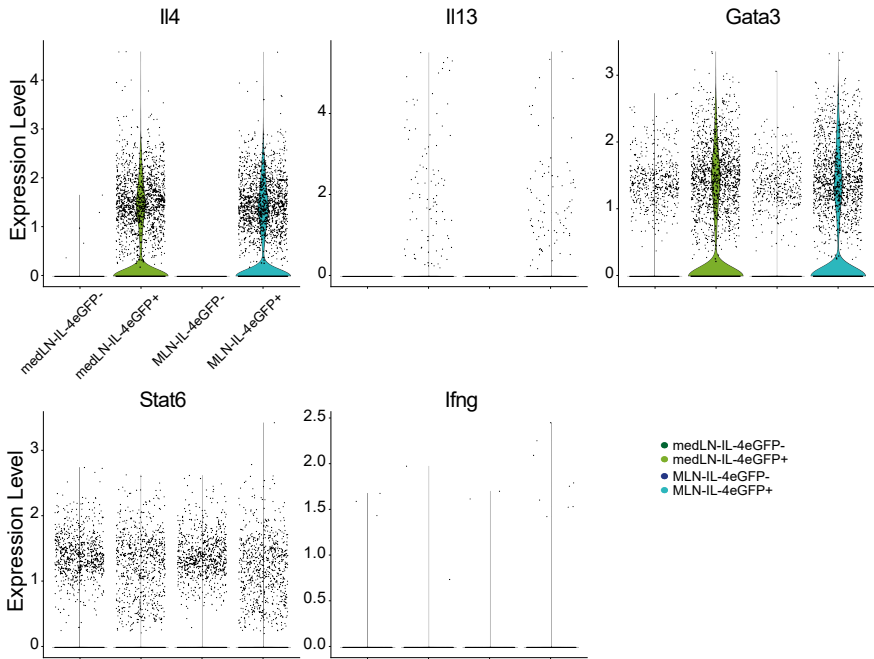

B

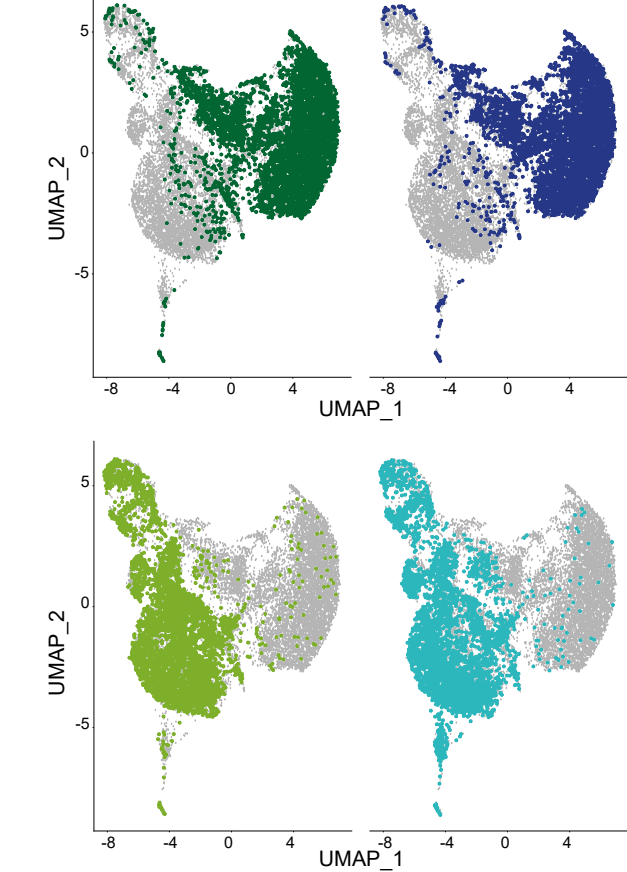

C

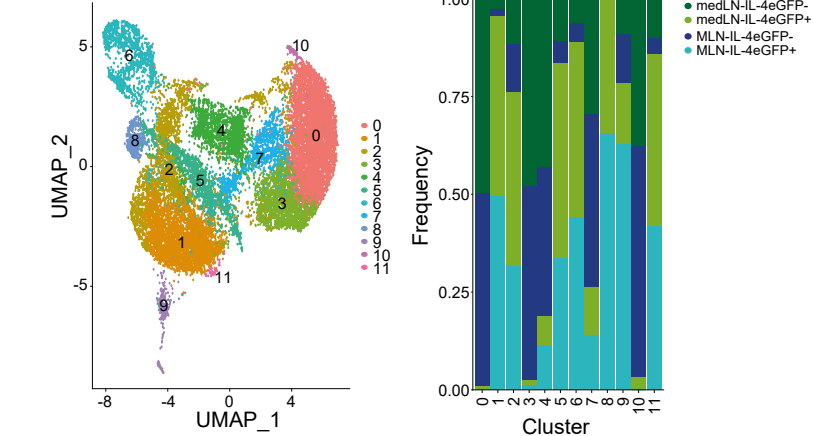

D

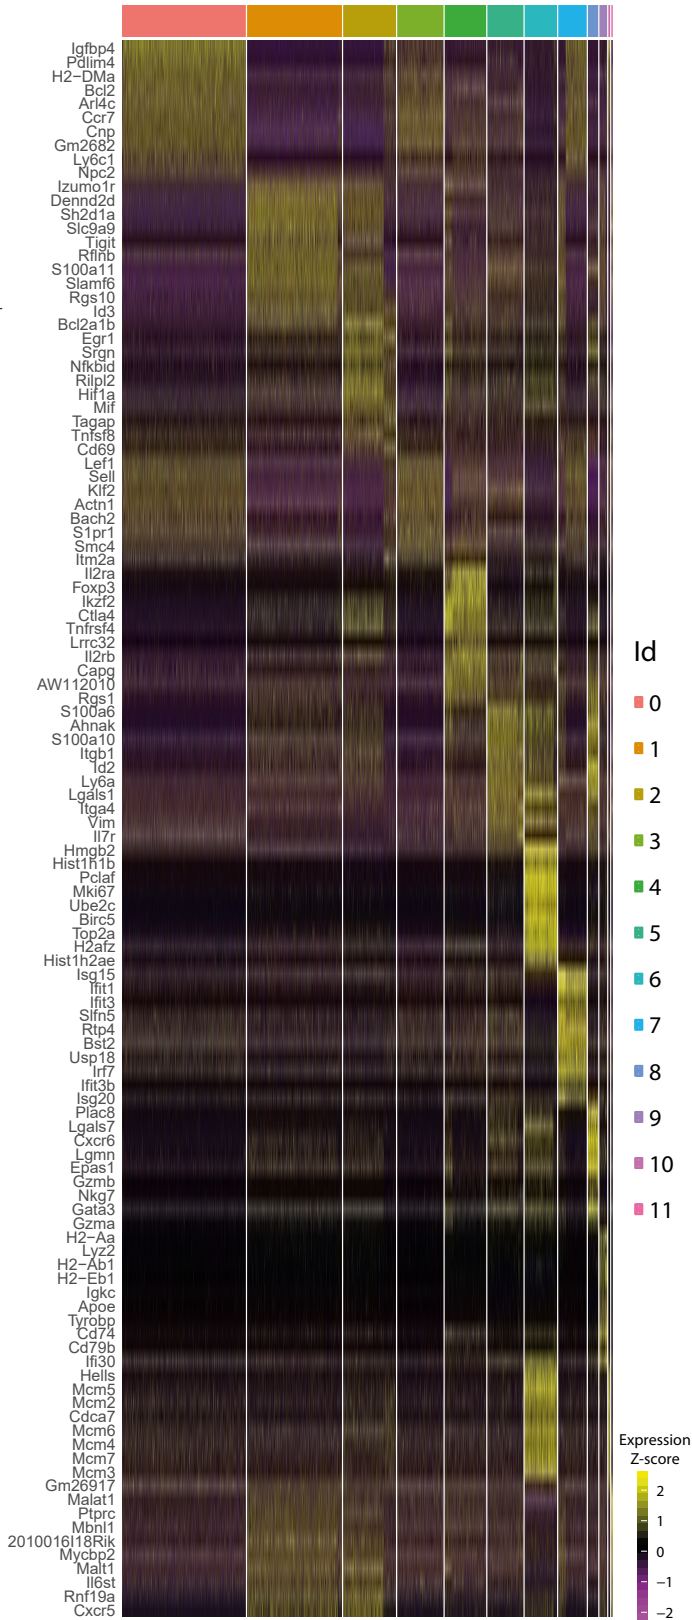

E

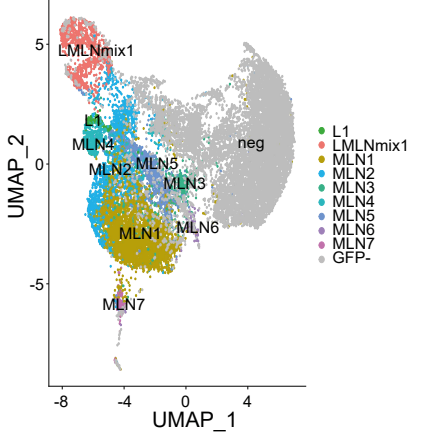

Supplement: supp [file elife-74183-supp-v1.zip › elife_poa_e74183_Figure_1_figure_supplement_3.pdf]

Figure 2—figure supplement 1

A

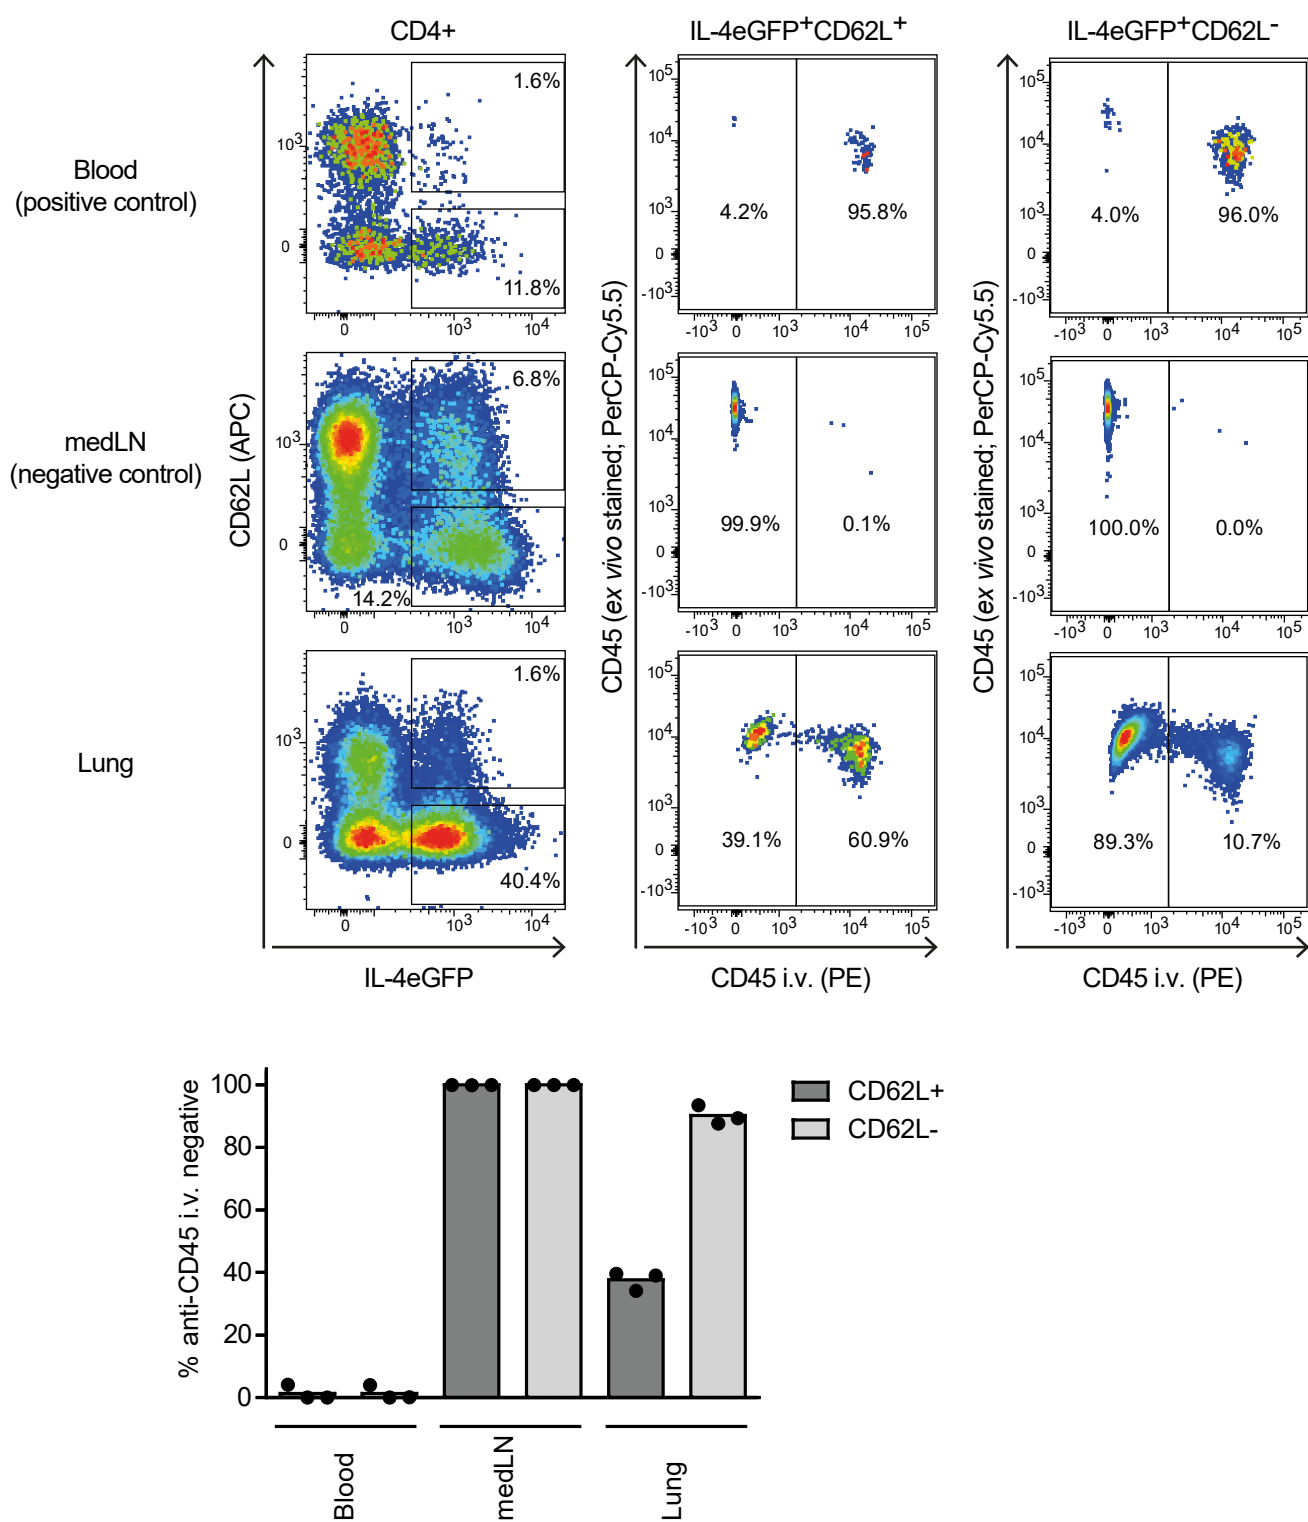

Supplement: supp [file elife-74183-supp-v1.zip › elife_poa_e74183_Figure_2_figure_supplement_1.pdf]

Figure 2—figure supplement 2

A

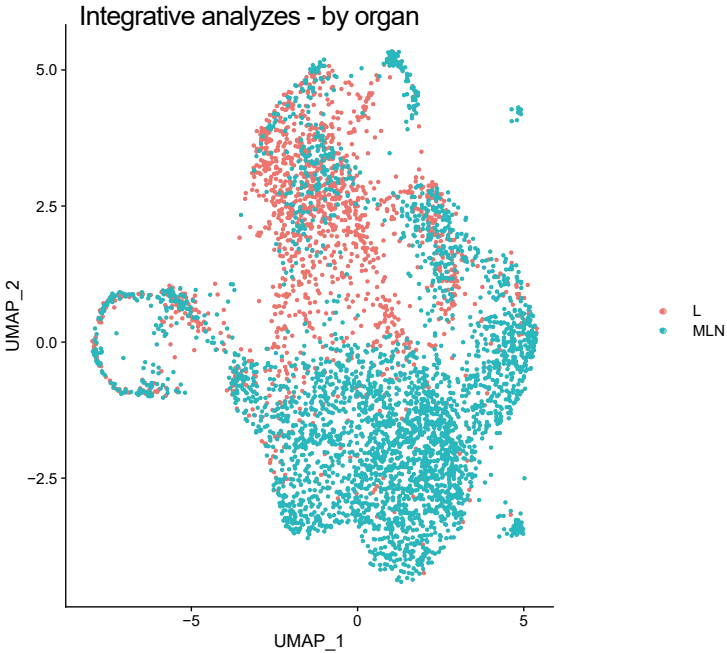

B

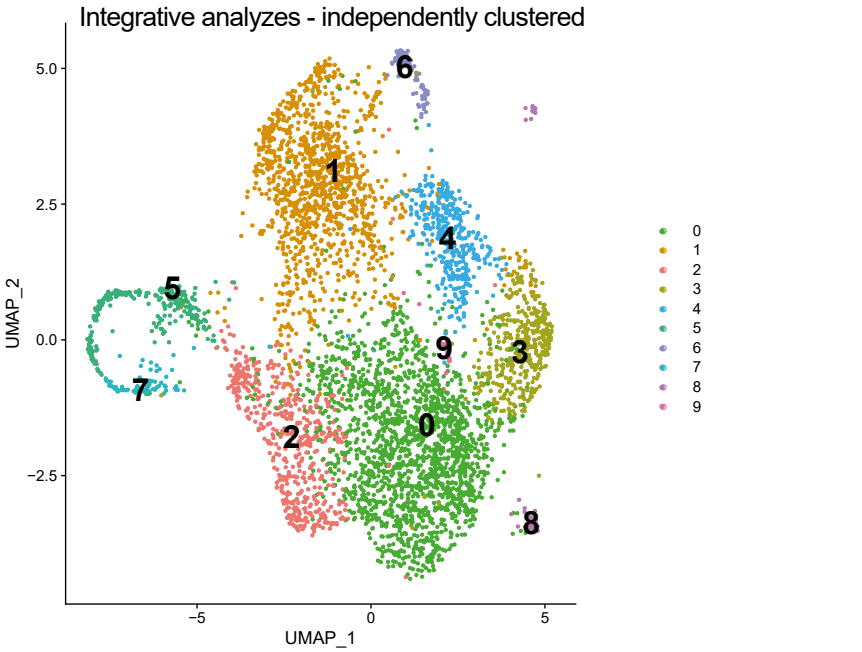

C

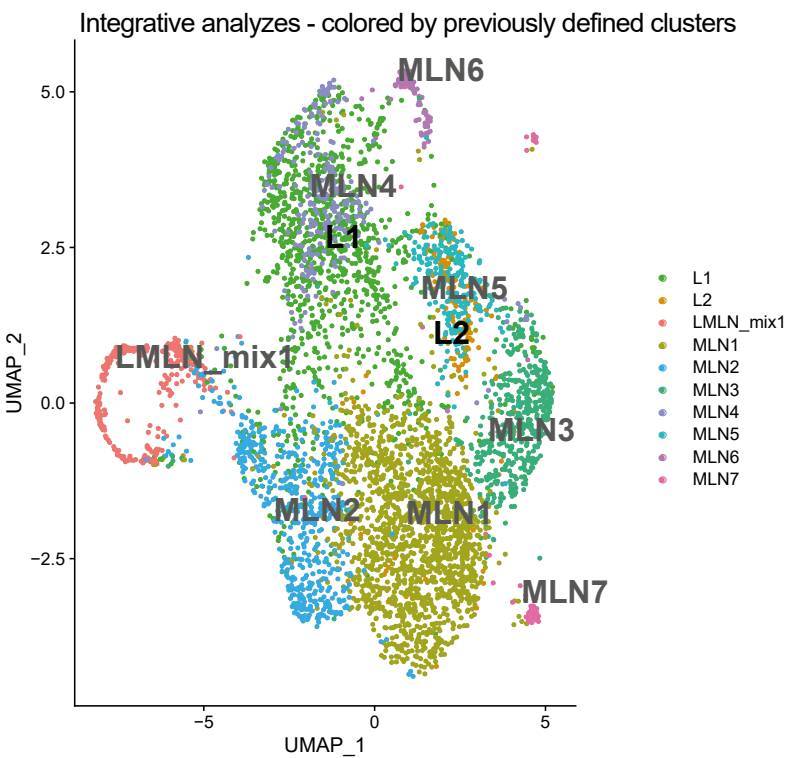

Supplement: supp [file elife-74183-supp-v1.zip › elife_poa_e74183_Figure_2_figure_supplement_2.pdf]

Figure 2—figure supplement 3

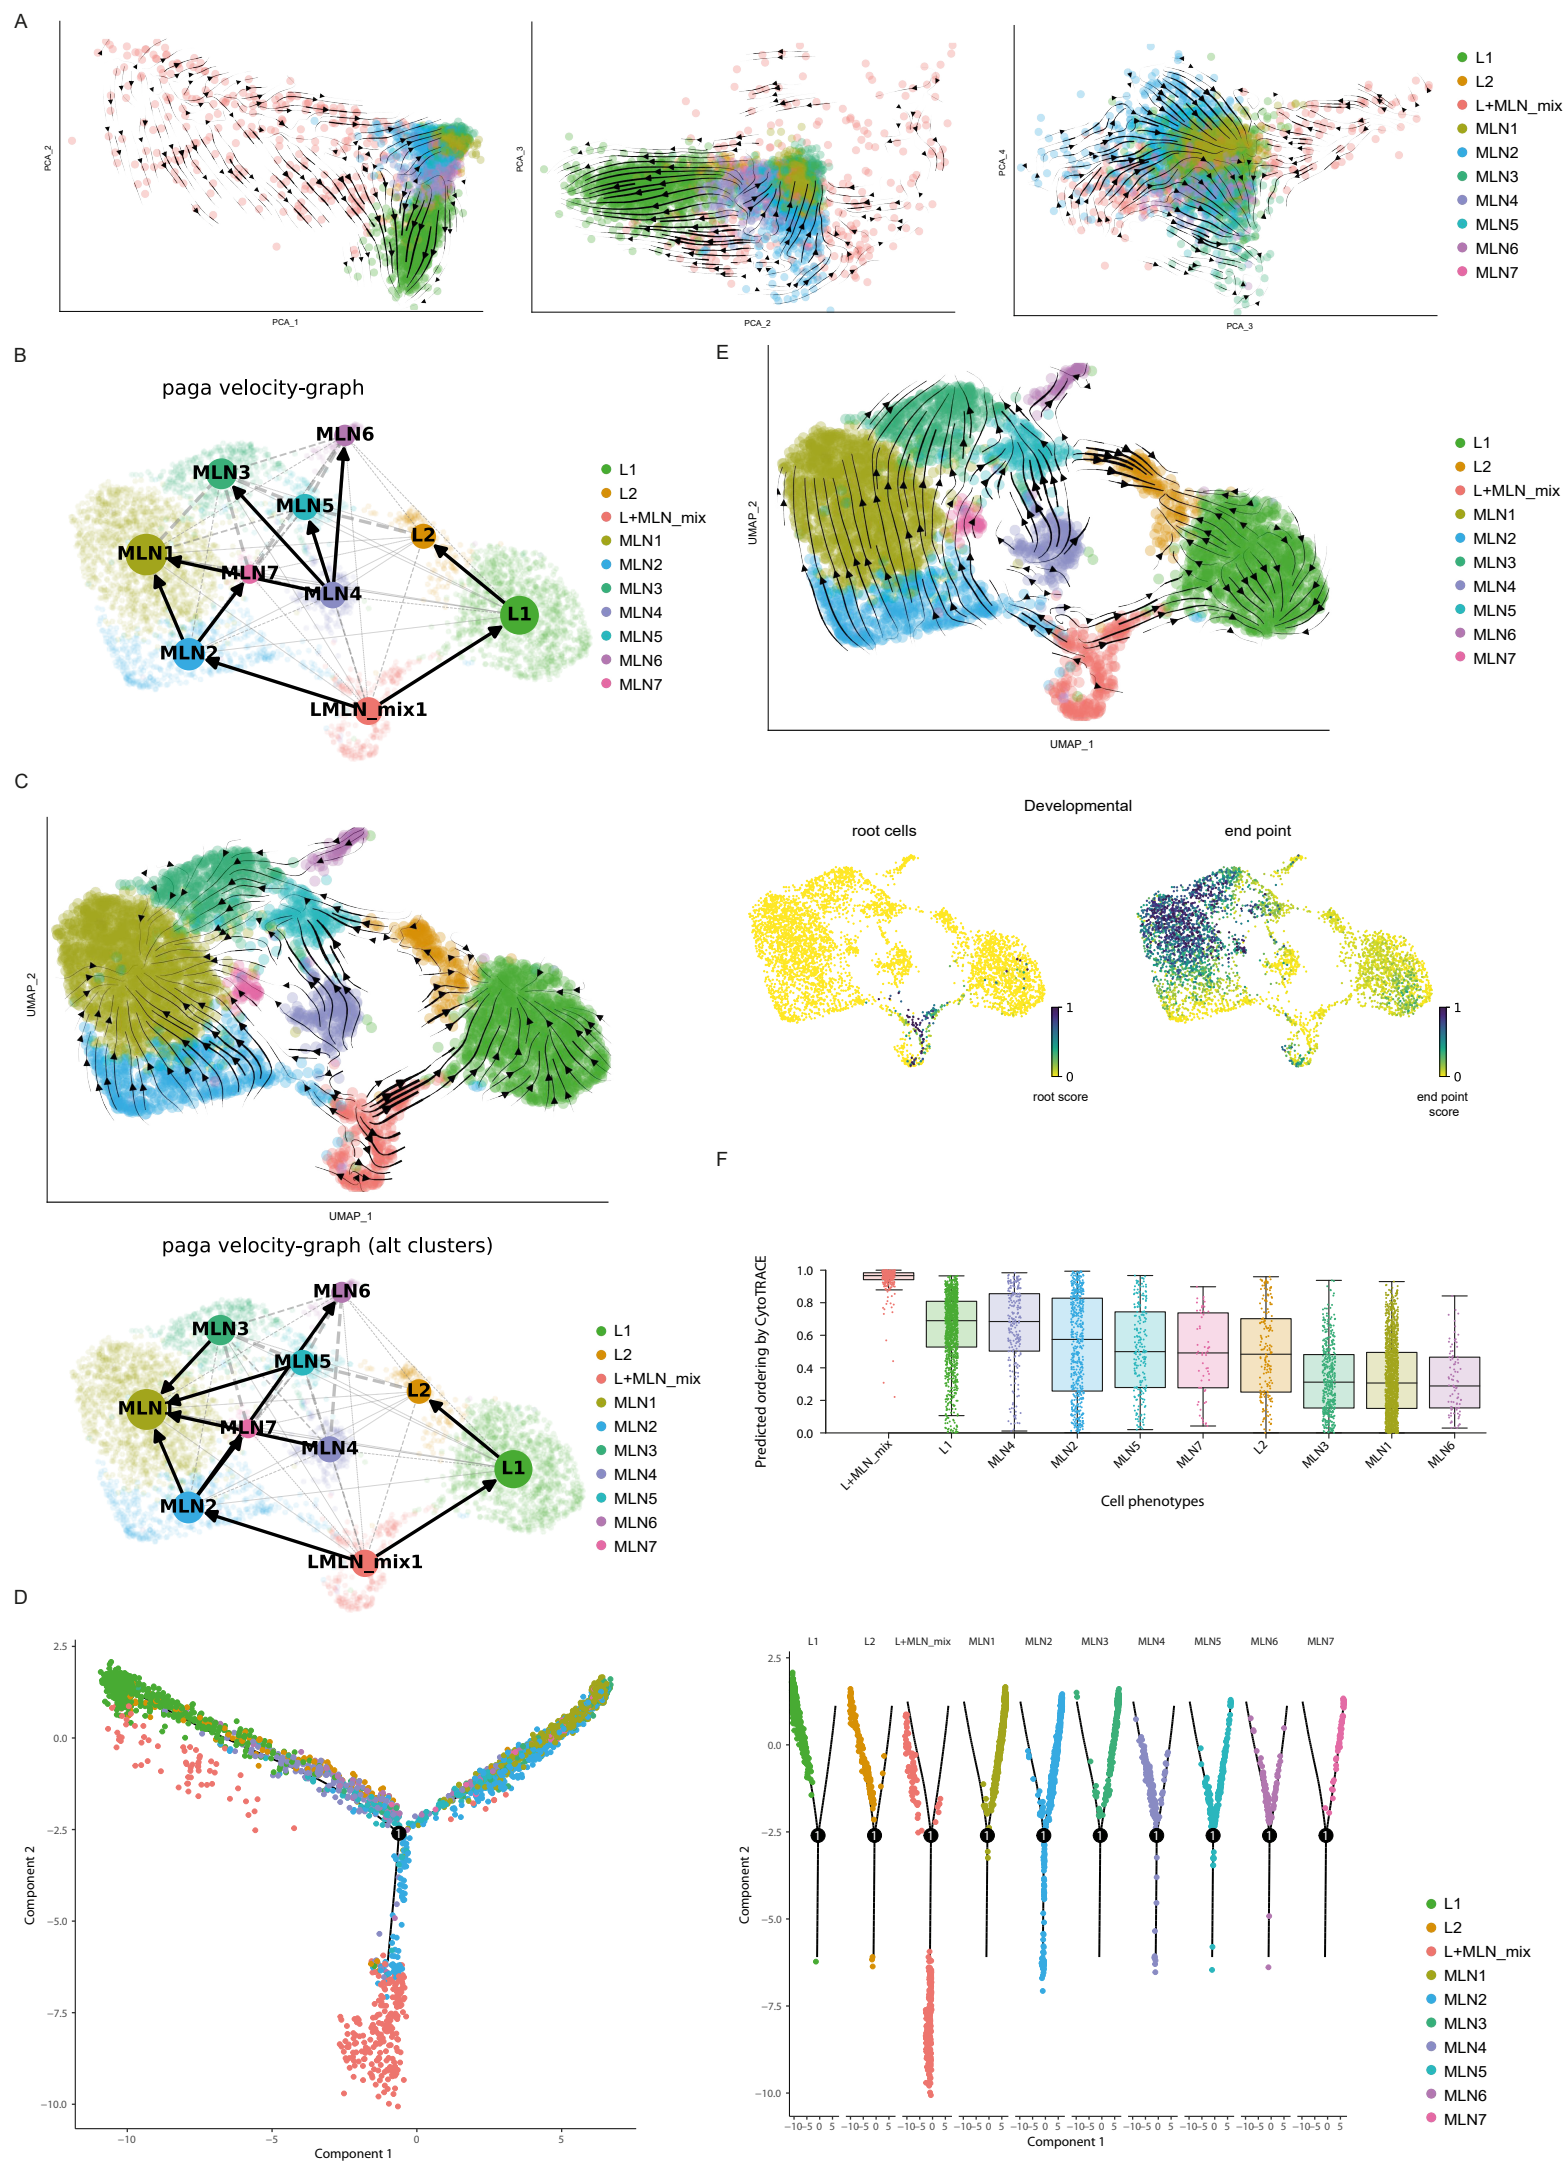

Supplement: supp [file elife-74183-supp-v1.zip › elife_poa_e74183_Figure_2_figure_supplement_3.pdf]

Figure 3—figure supplement 1

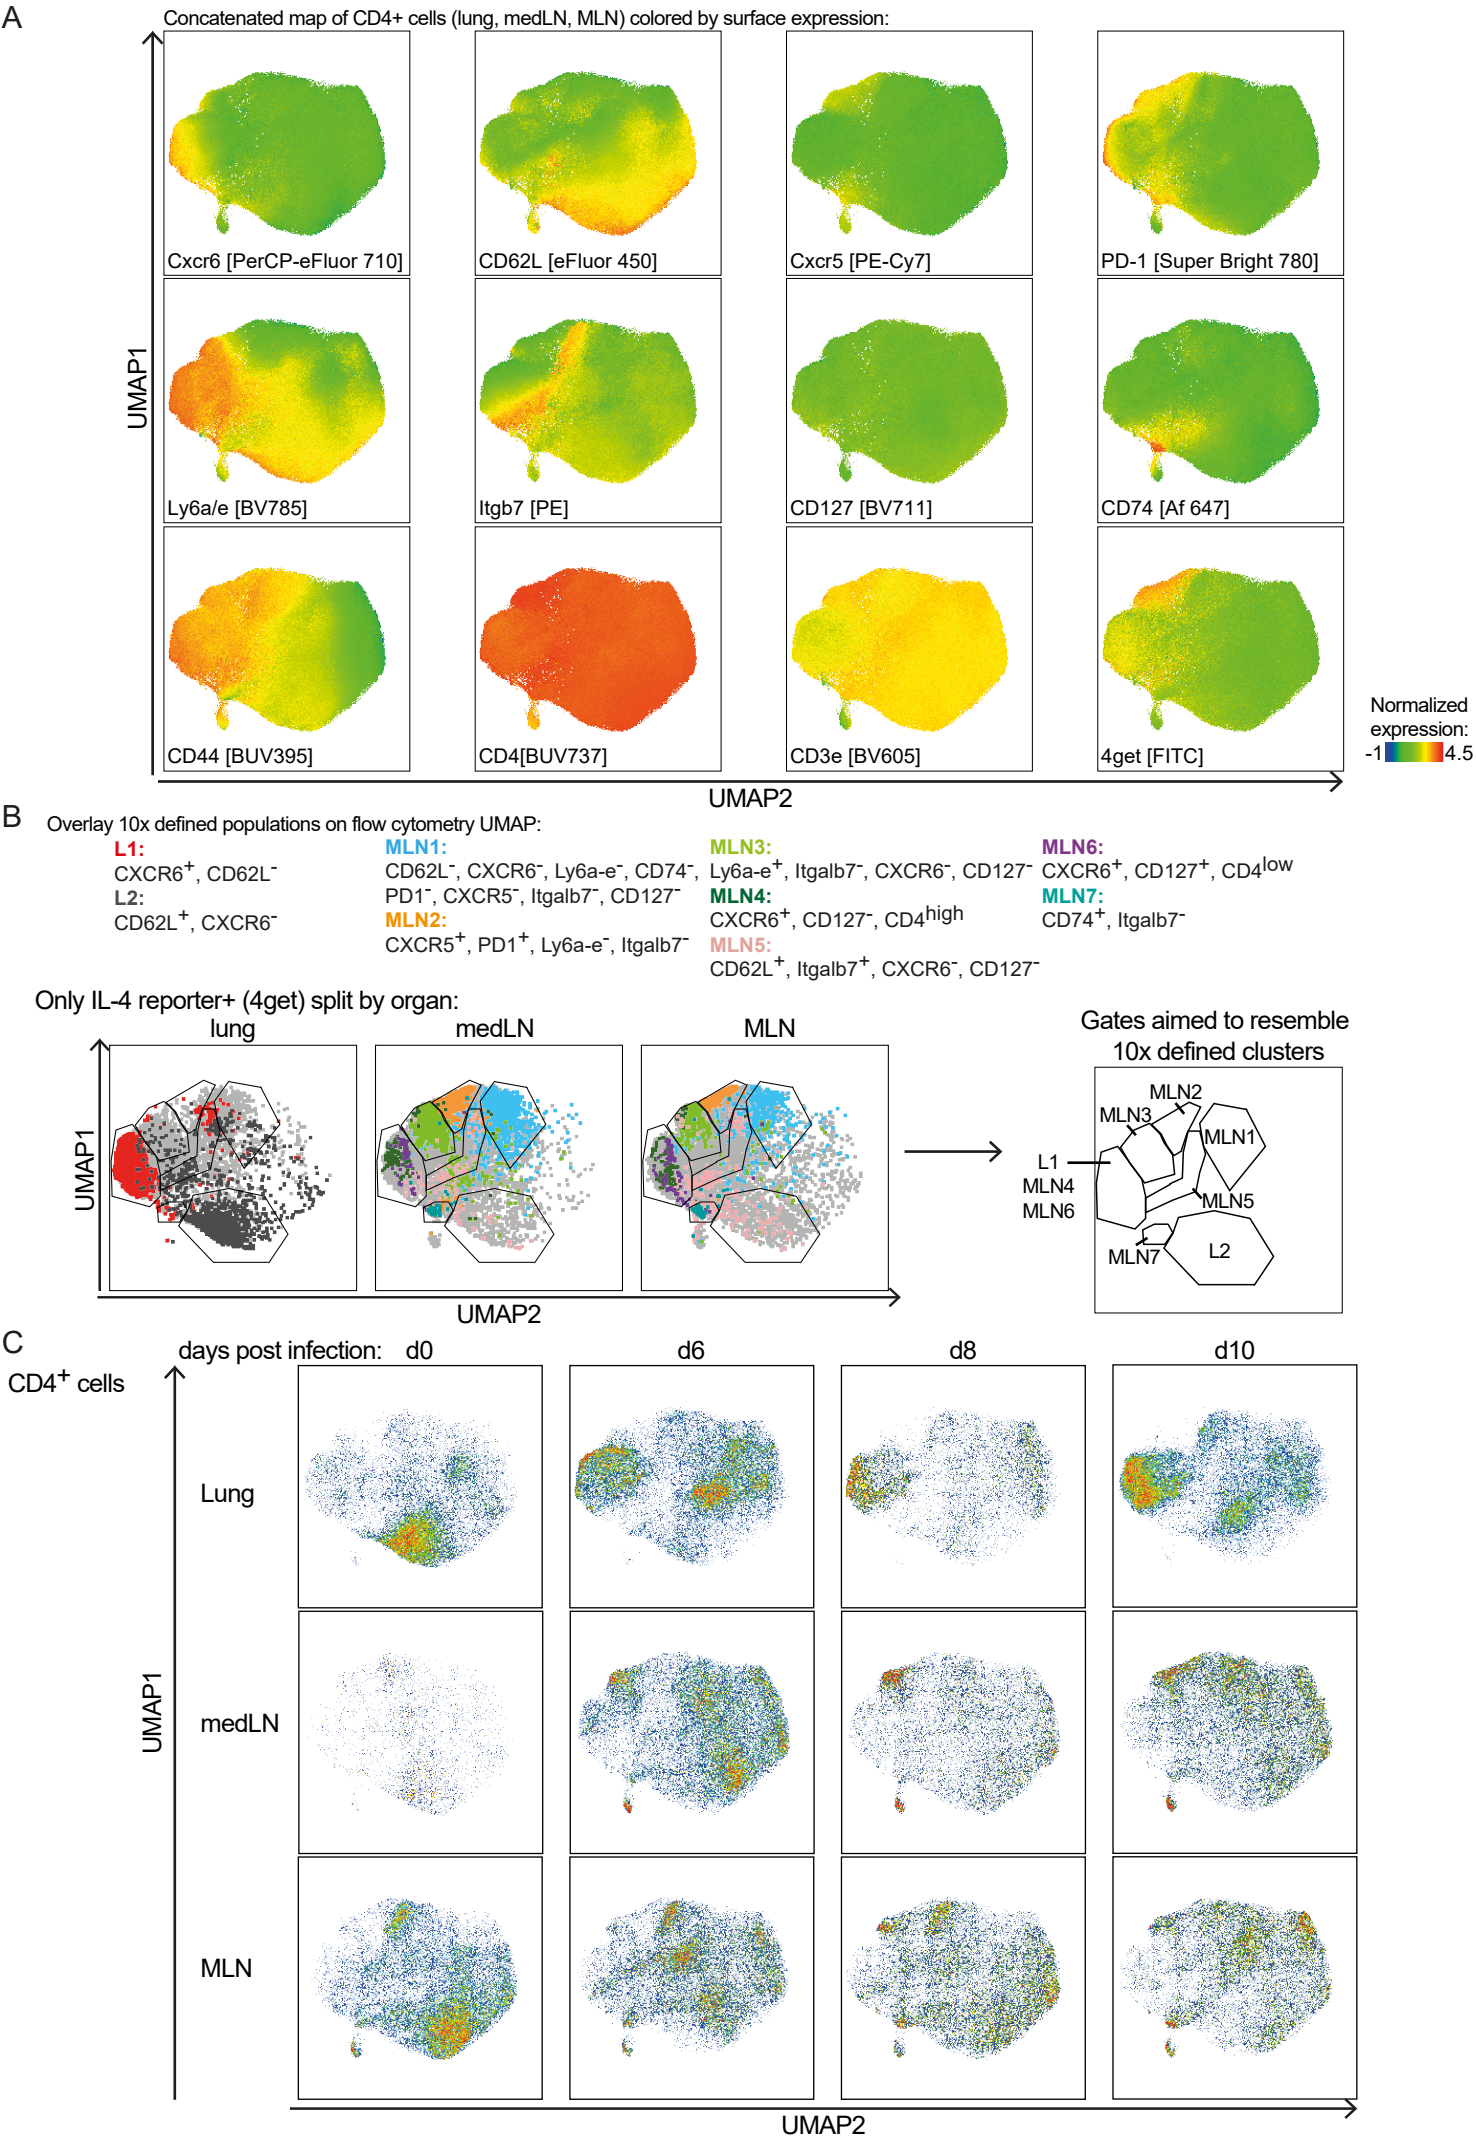

Supplement: supp [file elife-74183-supp-v1.zip › elife_poa_e74183_Figure_3_figure_supplement_1.pdf]

Figure 5—figure supplement 1

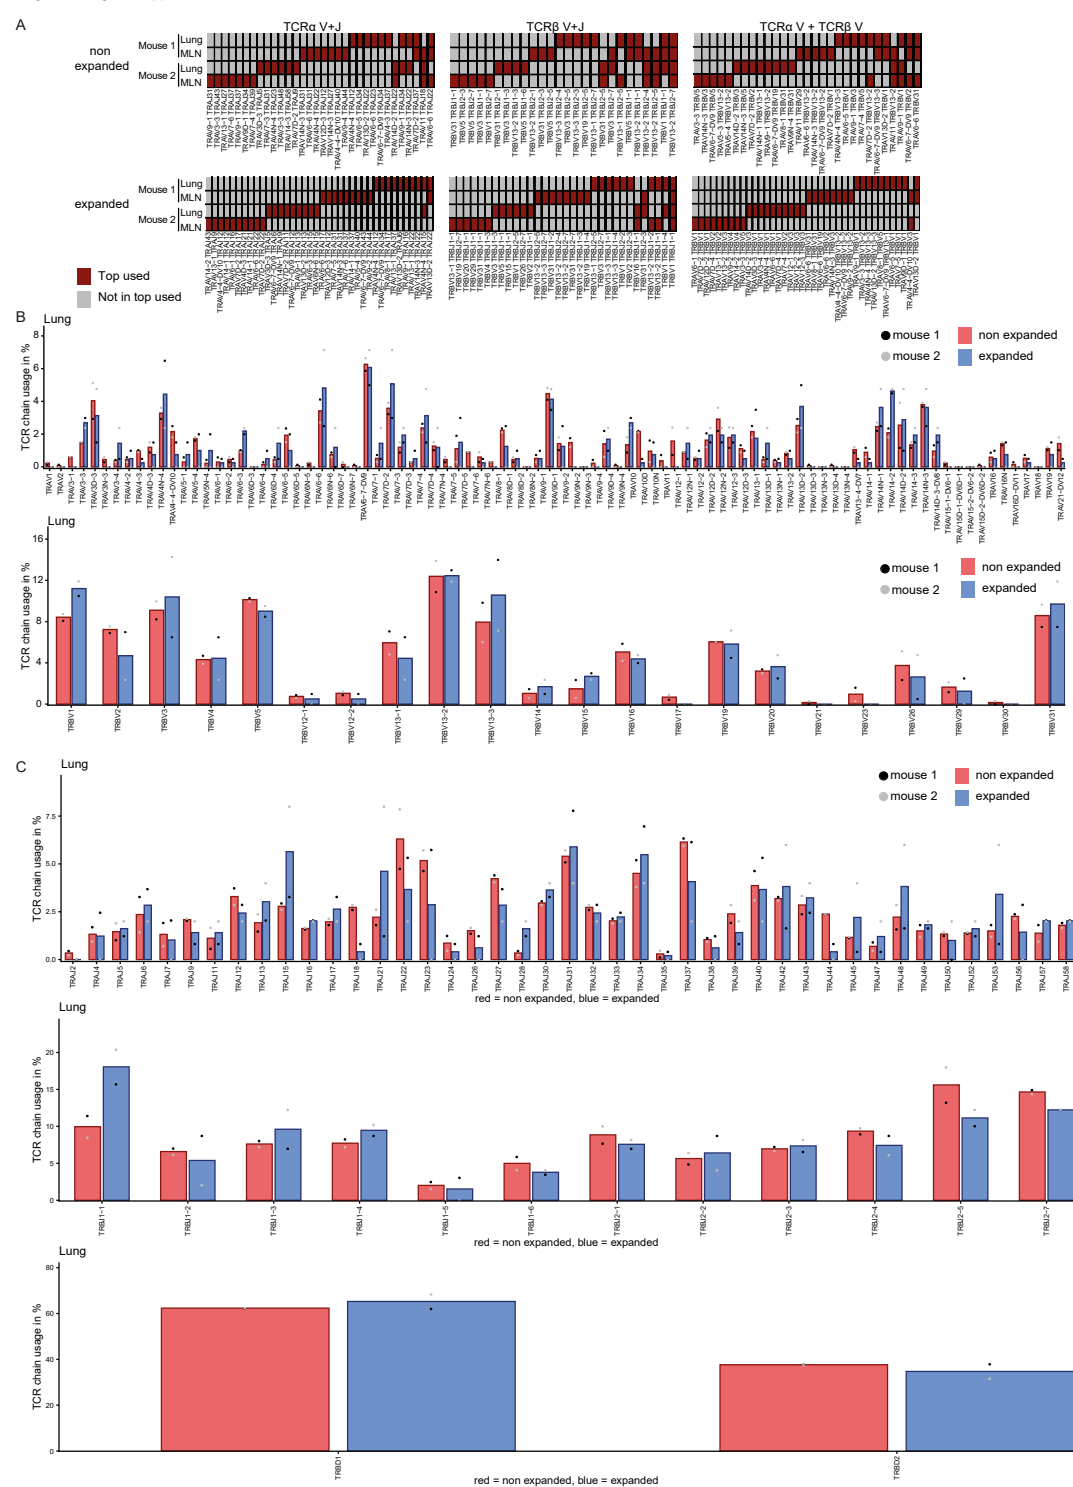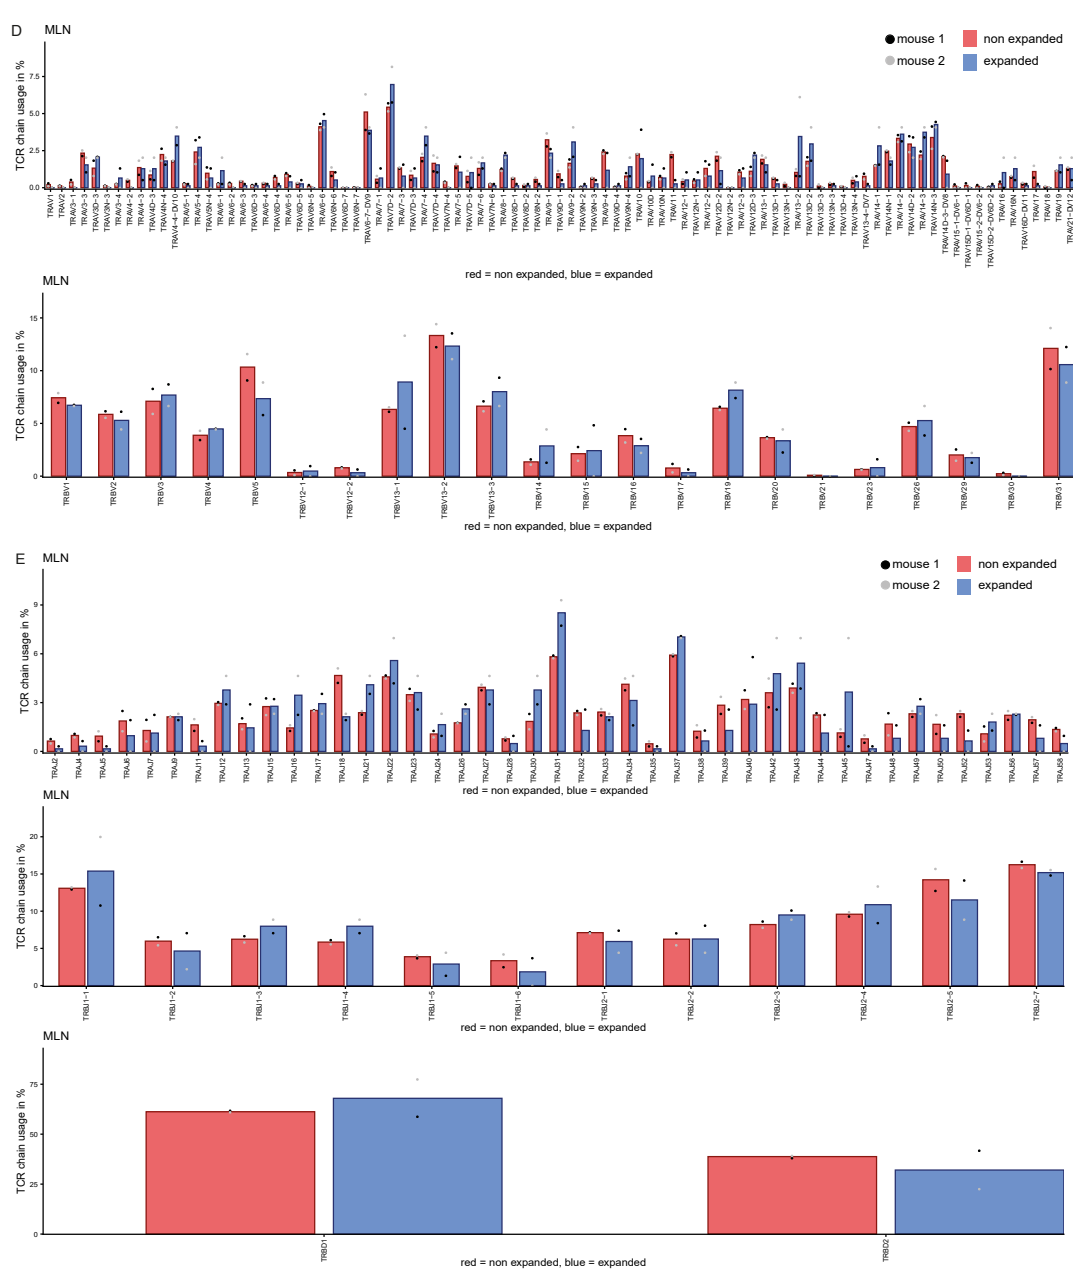

Supplement: supp [file elife-74183-supp-v1.zip › elife_poa_e74183_Figure_5_figure_supplement_1.pdf]

Figure 5—figure supplement 2

A

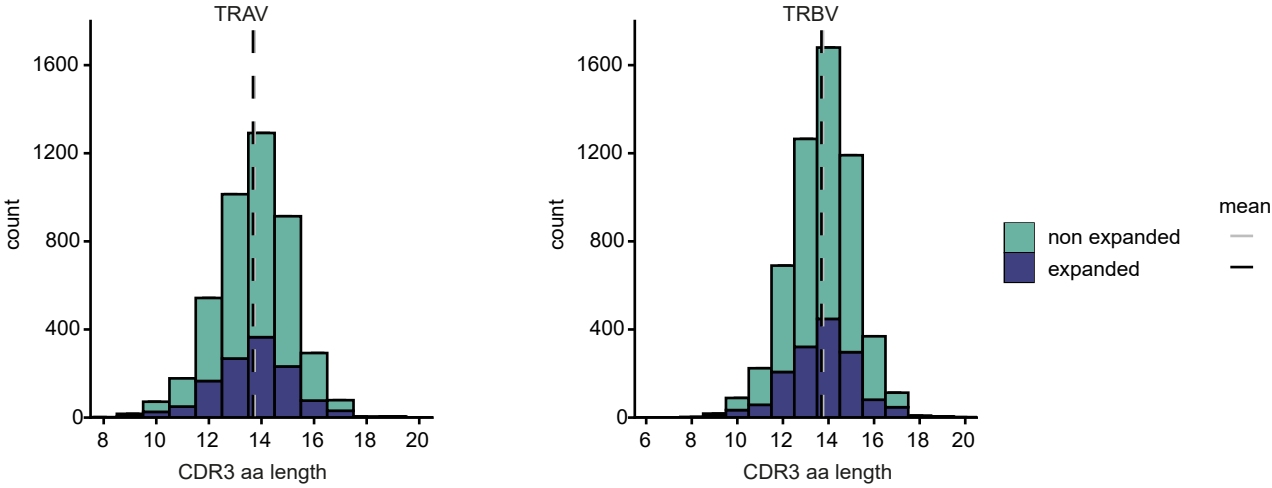

B

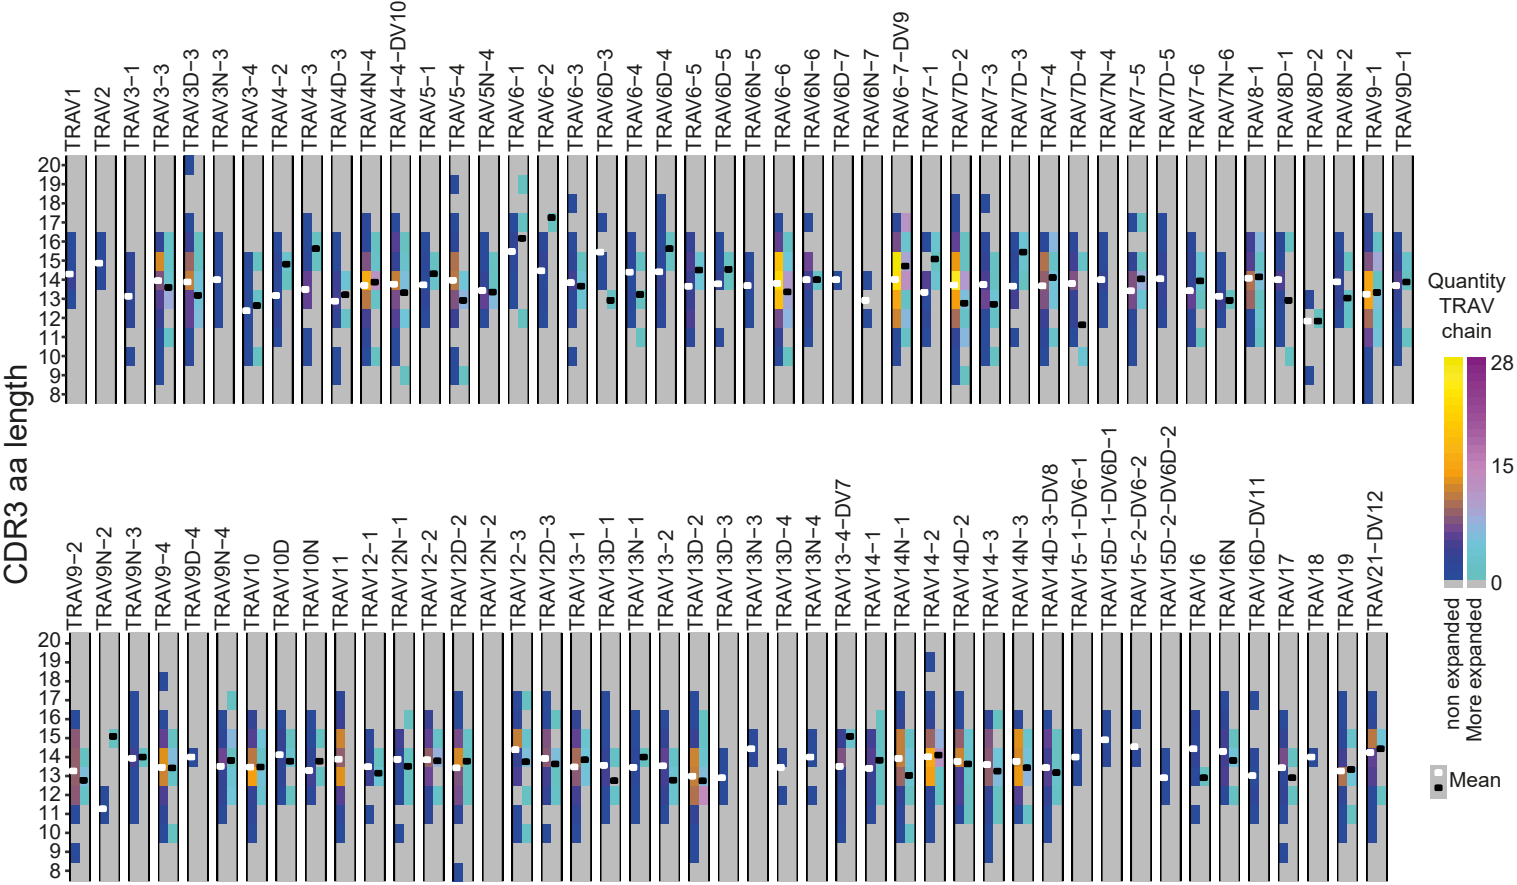

C

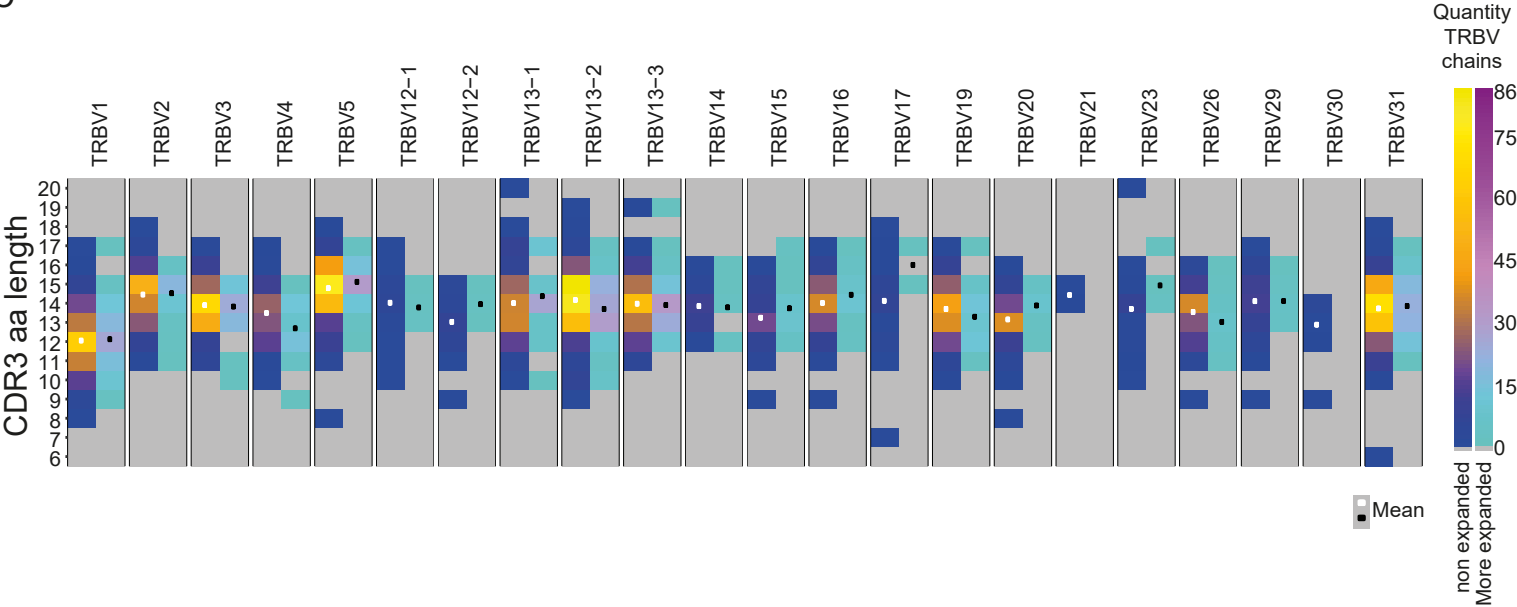

Supplement: supp [file elife-74183-supp-v1.zip › elife_poa_e74183_Figure_5_figure_supplement_2.pdf]
